# Supplementary material for: Evaluation of the effect of optimal fit criteria on the compressive strength of open mortise and tenon corner joints
Source: Springer Nature journal article supplement (doi:10.1007/s00107-020-01509-w), 2020-02-19
Supplement: MOESM1 [file 17721474]

**Supplementary Data**

***European Journal of Wood and Wood Products***

**Evaluation of the Effect of Optimal Fit Criteria on the Compressive Strength of Open Mortise and Tenon Corner Joints**

László Elek1, Zsolt Kovács1, Levente Csóka1, Charu Agarwal1,*

1 Institute of Wood Based Products and Technologies, University of Sopron, 9400 Sopron, Hungary

* Corresponding author email: charu.agarwal3@gmail.com

Phone: +36 99518305


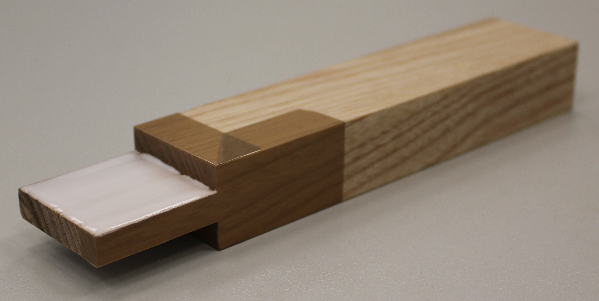


**Fig. S1** Adhesive applied onto the tenon


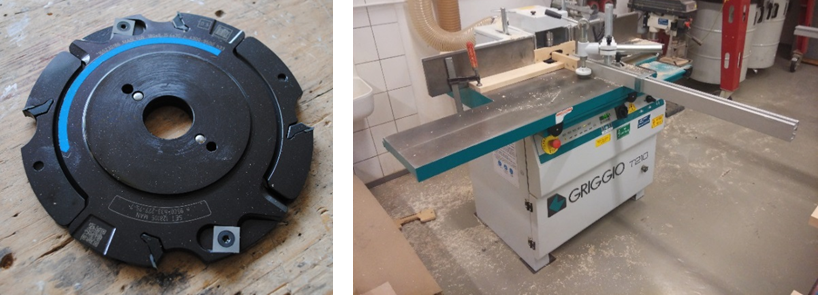


**Fig. S2** The milling tool with the knives (left) and the milling machine (right)


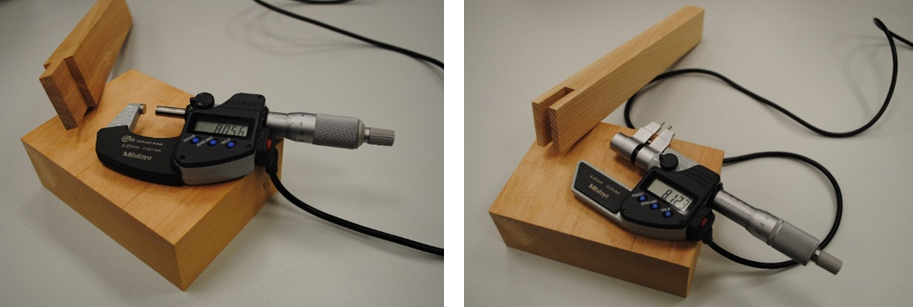


**Fig. S3** Mitutoyo micrometers for data measurement: standard/external (left) and internal (right) configurations

Table S1 R & R test of the measured data at the 2nd point of measurement of the tenon specimens for all the three testers (specimen-to-specimen variation)

| Source  (Sigma=R-bar/d2) | Variance Components:  Mean=8.19919, R-bar=0.145E-1 R(xbar)=0.379E-1, R(specimens)=0.103889  Operators: 3, Specimens: 60, Trials: 3 | | | |
| --- | --- | --- | --- | --- |
| Estimated  Sigma | Estimated  Variance | % of  R & R | % of  Total |
| Repeatability | 0.008554 | 0.000073 | 15.6978 | 7.6341 |
| Reproducibility | 0.019822 | 0.000393 | 84.3022 | 40.9977 |
| Specimen-to-specimen | 0.022188 | 0.000492 |  | 51.3682 |
| Combined R & R | 0.021589 | 0.000466 | 100.0000 | 48.6318 |
| Total | 0.030958 | 0.000958 |  | 100.0000 |

Table S2 R & R test of the measured data at the 3rd point of measurement of the tenon specimens for all the three testers (specimen-to-specimen variation)

| Source  (Sigma=R-bar/d2) | Variance Components:  Mean=8.20243, R-bar=0.135E-1 R(xbar)=0.280E-1, R(specimens)=0.940E-1  Operators: 3, Specimens: 60, Trials: 3 | | | |
| --- | --- | --- | --- | --- |
| Estimated  Sigma | Estimated  Variance | % of  R & R | % of  Total |
| Repeatability | 0.008002 | 0.000064 | 23.0432 | 9.4040 |
| Reproducibility | 0.014624 | 0.000214 | 76.9568 | 31.4062 |
| Specimen-to-specimen | 0.020076 | 0.000403 |  | 59.1898 |
| Combined R & R | 0.016670 | 0.000278 | 100.0000 | 40.8102 |
| Total | 0.026095 | 0.000681 |  | 100.0000 |

Table S3 R & R test of the measured data at the 4th point of measurement of the tenon specimens for all the three testers (specimen-to-specimen variation)

| Source  (Sigma=R-bar/d2) | Variance Components:  Mean=8.17318, R-bar=0.128E-1 R(xbar)=0.352E-1, R(specimens)=0.120333  Operators: 3, Specimens: 60, Trials: 3 | | | |
| --- | --- | --- | --- | --- |
| Estimated  Sigma | Estimated  Variance | % of  R & R | % of  Total |
| Repeatability | 0.007562 | 0.000057 | 14.4085 | 5.4084 |
| Reproducibility | 0.018432 | 0.000340 | 85.5915 | 32.1282 |
| Specimen-to-specimen | 0.025700 | 0.000661 |  | 62.4634 |
| Combined R & R | 0.019923 | 0.000397 | 100.0000 | 37.5366 |
| Total | 0.032518 | 0.001057 |  | 100.0000 |

Table S4 R & R test of the measured data at the 5th point of measurement of the tenon specimens for all the three testers (specimen-to-specimen variation)

| Source  (Sigma=R-bar/d2) | Variance Components:  Mean=8.20696, R-bar=0.116E-1 R(xbar)=0.368E-1, R(specimens)=0.119111  Operators: 3, Specimens: 60, Trials: 3 | | | |
| --- | --- | --- | --- | --- |
| Estimated  Sigma | Estimated  Variance | % of  R & R | % of  Total |
| Repeatability | 0.006857 | 0.000047 | 11.2435 | 4.4133 |
| Reproducibility | 0.019265 | 0.000371 | 88.7565 | 34.8383 |
| Specimen-to-specimen | 0.025439 | 0.000647 |  | 60.7484 |
| Combined R & R | 0.020449 | 0.000418 | 100.0000 | 39.2516 |
| Total | 0.032639 | 0.001065 |  | 100.0000 |

Table S5 R & R test of the measured data at the 2nd point of measurement of the tenon specimens for all the three testers (given acceptable tolerance)

| Source  (Pooled Standard Deviation) | Percent Tolerance Analysis:  Mean=8.19919, Standard Deviation=0.291E-1  Operators: 3, Specimens: 60, Trials: 3 | | | |
| --- | --- | --- | --- | --- |
| Measurement  Units | % Process  Variation | % Total  Contribution | %  Tolerence |
| Repeatability (Equipment Variation) | 0.044186 | 27.8700 | 7.7674 | 22.0930 |
| Reproducibility (Appraiser Variation) | 0.101467 | 63.9997 | 40.9597 | 50.7336 |
| Specimen Variation | 0.113525 | 71.6052 | 51.2730 | 56.7626 |
| Combined R & R | 0.110671 | 69.8047 | 48.7270 | 55.3353 |
| Total Process Variation | 0.158543 | 100.0000 | 100.0000 | 79.2716 |
| Tolerance | 0.200000 |  |  | 100.0000 |

Table S6 R & R test of the measured data at the 3rd point of measurement of the tenon specimens for all the three testers (given acceptable tolerance)

| Source  (Pooled Standard Deviation) | Percent Tolerance Analysis:  Mean=8.20243, Standard Deviation=0.266E-1  Operators: 3, Specimens: 60, Trials: 3 | | | |
| --- | --- | --- | --- | --- |
| Measurement  Units | % Process  Variation | % Total  Contribution | %  Tolerence |
| Repeatability (Equipment Variation) | 0.041502 | 30.1452 | 9.0873 | 20.7510 |
| Reproducibility (Appraiser Variation) | 0.082413 | 59.8608 | 35.8332 | 41.2063 |
| Specimen Variation | 0.102175 | 74.2156 | 55.0795 | 51.0876 |
| Combined R & R | 0.092273 | 67.0228 | 44.9205 | 46.1363 |
| Total Process Variation | 0.137674 | 100.0000 | 100.0000 | 68.8368 |
| Tolerance | 0.200000 |  |  | 100.0000 |

Table S7 R & R test of the measured data at the 4th point of measurement of the tenon specimens for all the three testers (given acceptable tolerance)

| Source  (Pooled Standard Deviation) | Percent Tolerance Analysis:  Mean=8.17318, Standard Deviation=0.344E-1  Operators: 3, Specimens: 60, Trials: 3 | | | |
| --- | --- | --- | --- | --- |
| Measuremnt  Units | % Process  Variation | % Total  Contribution | %  Tolerence |
| Repeatability (Equipment Variation) | 0.038744 | 20.9829 | 4.4028 | 19.3722 |
| Reproducibility (Appraiser Variation) | 0.095164 | 51.5384 | 26.5621 | 47.5822 |
| Specimen Variation | 0.153419 | 83.0874 | 69.0351 | 76.7094 |
| Combined R & R | 0.102749 | 55.6461 | 30.9649 | 51.3746 |
| Total Process Variation | 0.184648 | 100.0000 | 100.0000 | 92.3238 |
| Tolerance | 0.200000 |  |  | 100.0000 |

Table S8 R & R test of the measured data at the 5th point of measurement of the tenon specimens for all the three testers (given acceptable tolerance)

| Source  (Pooled Standard Deviation) | Percent Tolerance Analysis:  Mean=8.20696, Standard Deviation=0.293E-1  Operators: 3, Specimens: 60, Trials: 3 | | | |
| --- | --- | --- | --- | --- |
| Measurement  Units | % Process  Variatn | % Total  Contribution | %  Tolerence |
| Repeatability (Equipment Variation) | 0.035606 | 22.1419 | 4.9026 | 17.8031 |
| Reproducibility (Appraiser Variation) | 0.108767 | 67.6370 | 45.7477 | 54.3835 |
| Specimen Variation | 0.112968 | 70.2494 | 49.3497 | 56.4839 |
| Combined R & R | 0.114447 | 71.1690 | 50.6503 | 57.2234 |
| Total Process Variation | 0.160810 | 100.0000 | 100.0000 | 80.4049 |
| Tolerance | 0.200000 |  |  | 100.0000 |


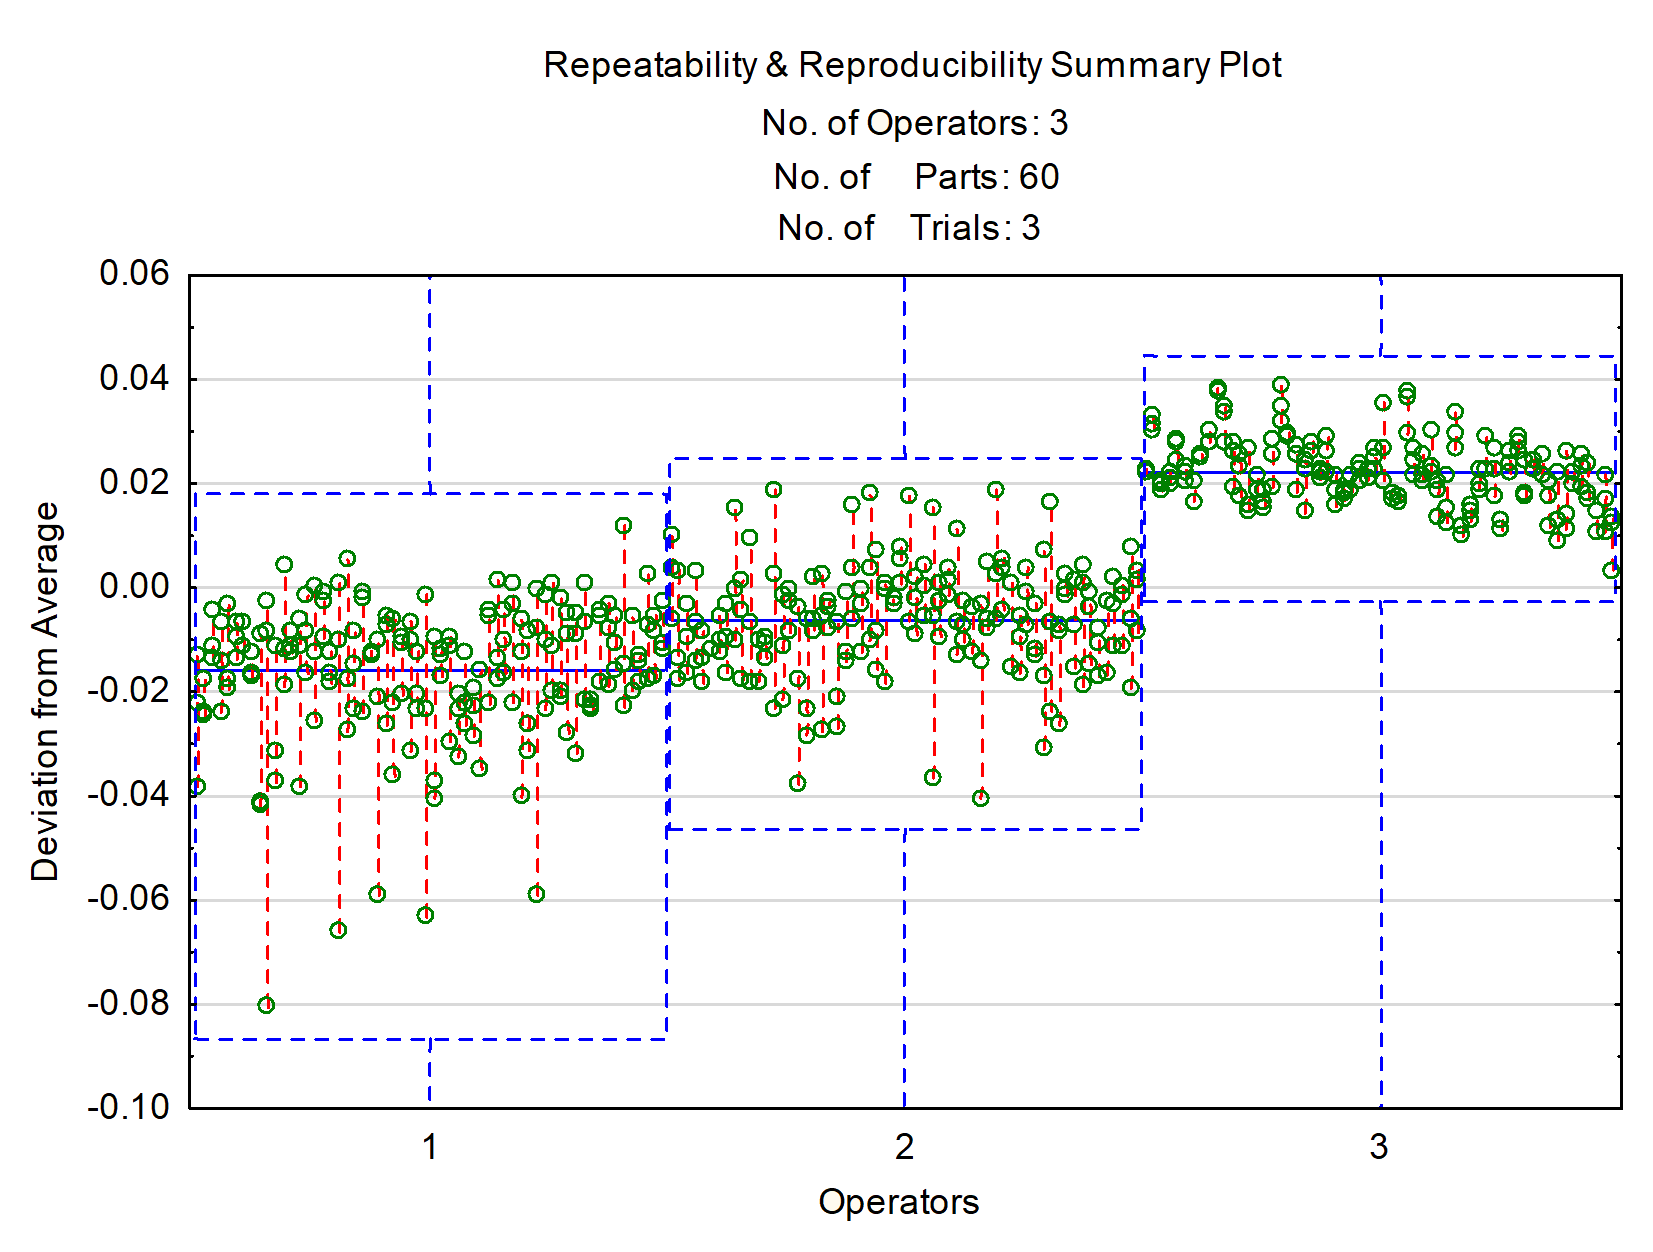


**Fig. S4** Graphical representation of the measured data at the 2nd point of measurement of the tenon specimens with respect to each of the three testers


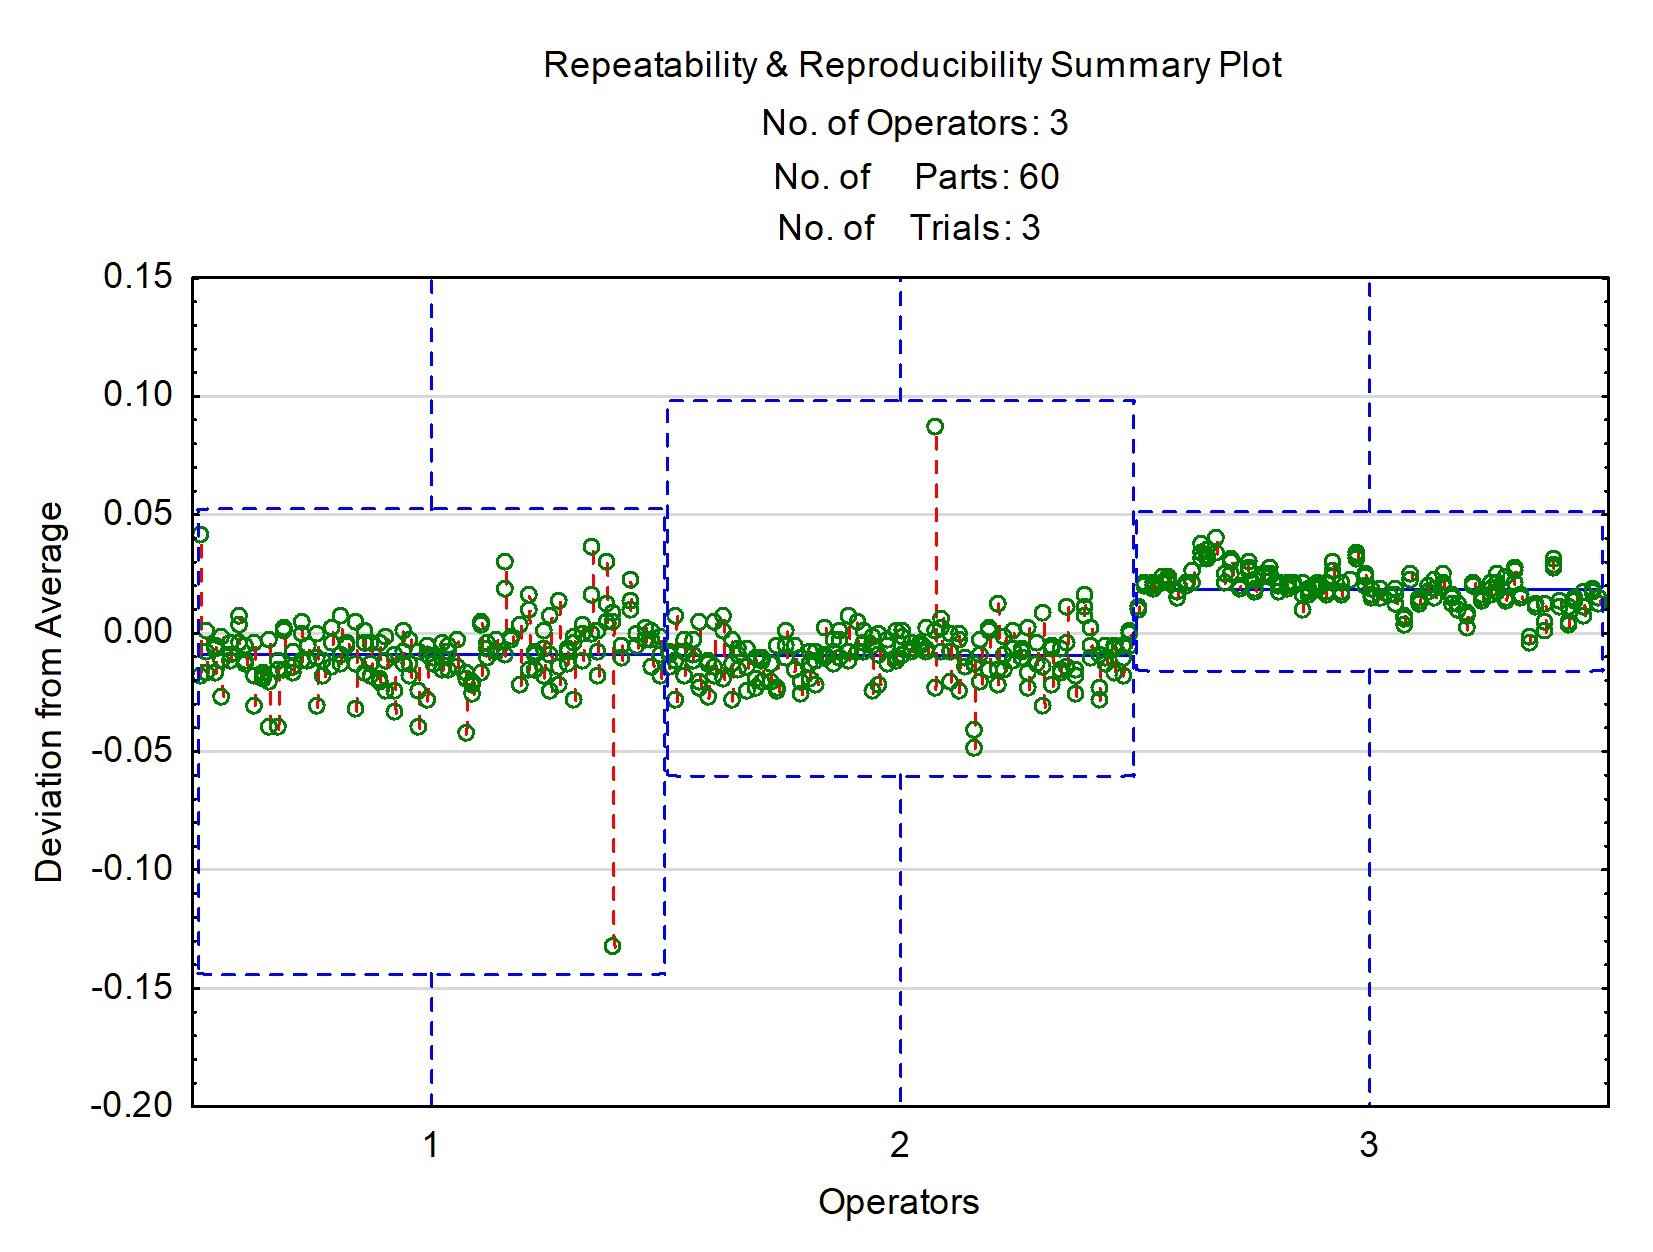


**Fig. S5** Graphical representation of the measured data at the 3rd point of measurement of the tenon specimens with respect to each of the three testers


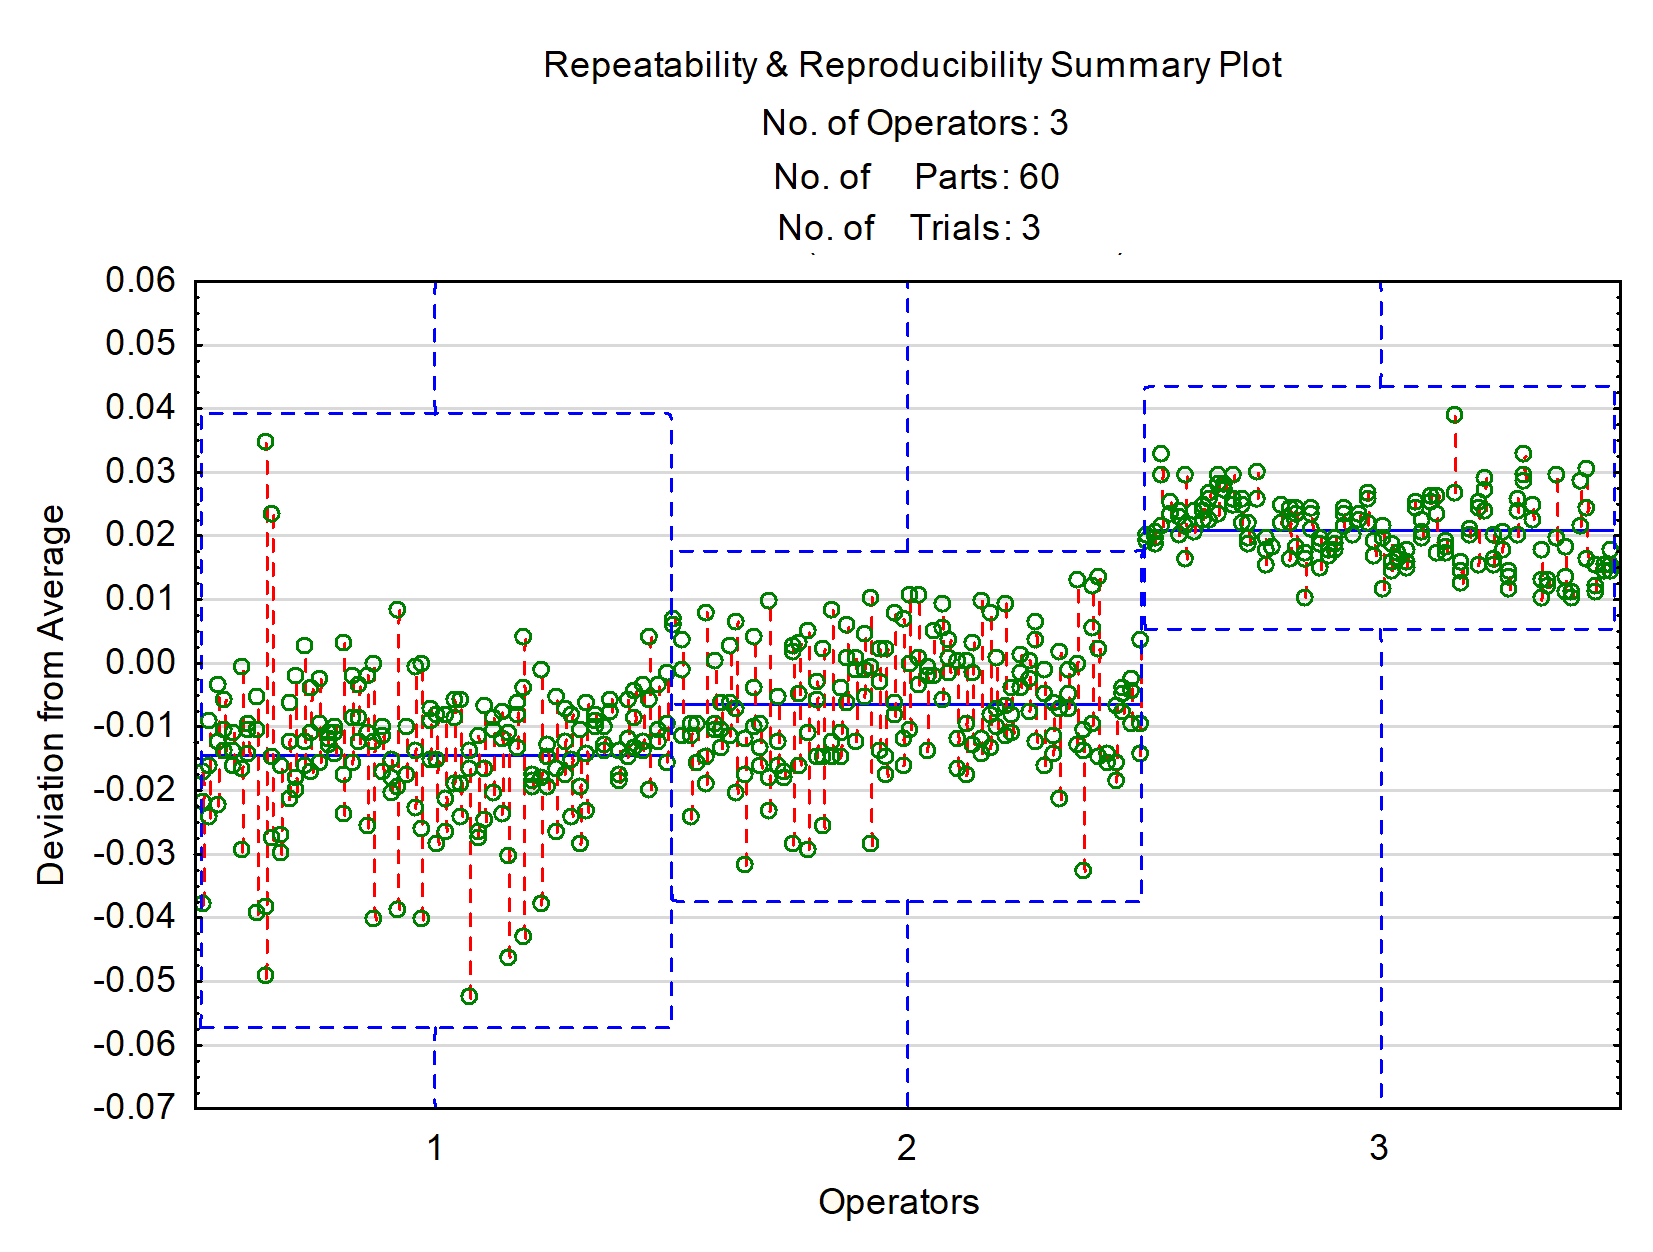


**Fig. S6** Graphical representation of the measured data at the 4th point of measurement of the tenon specimens with respect to each of the three testers


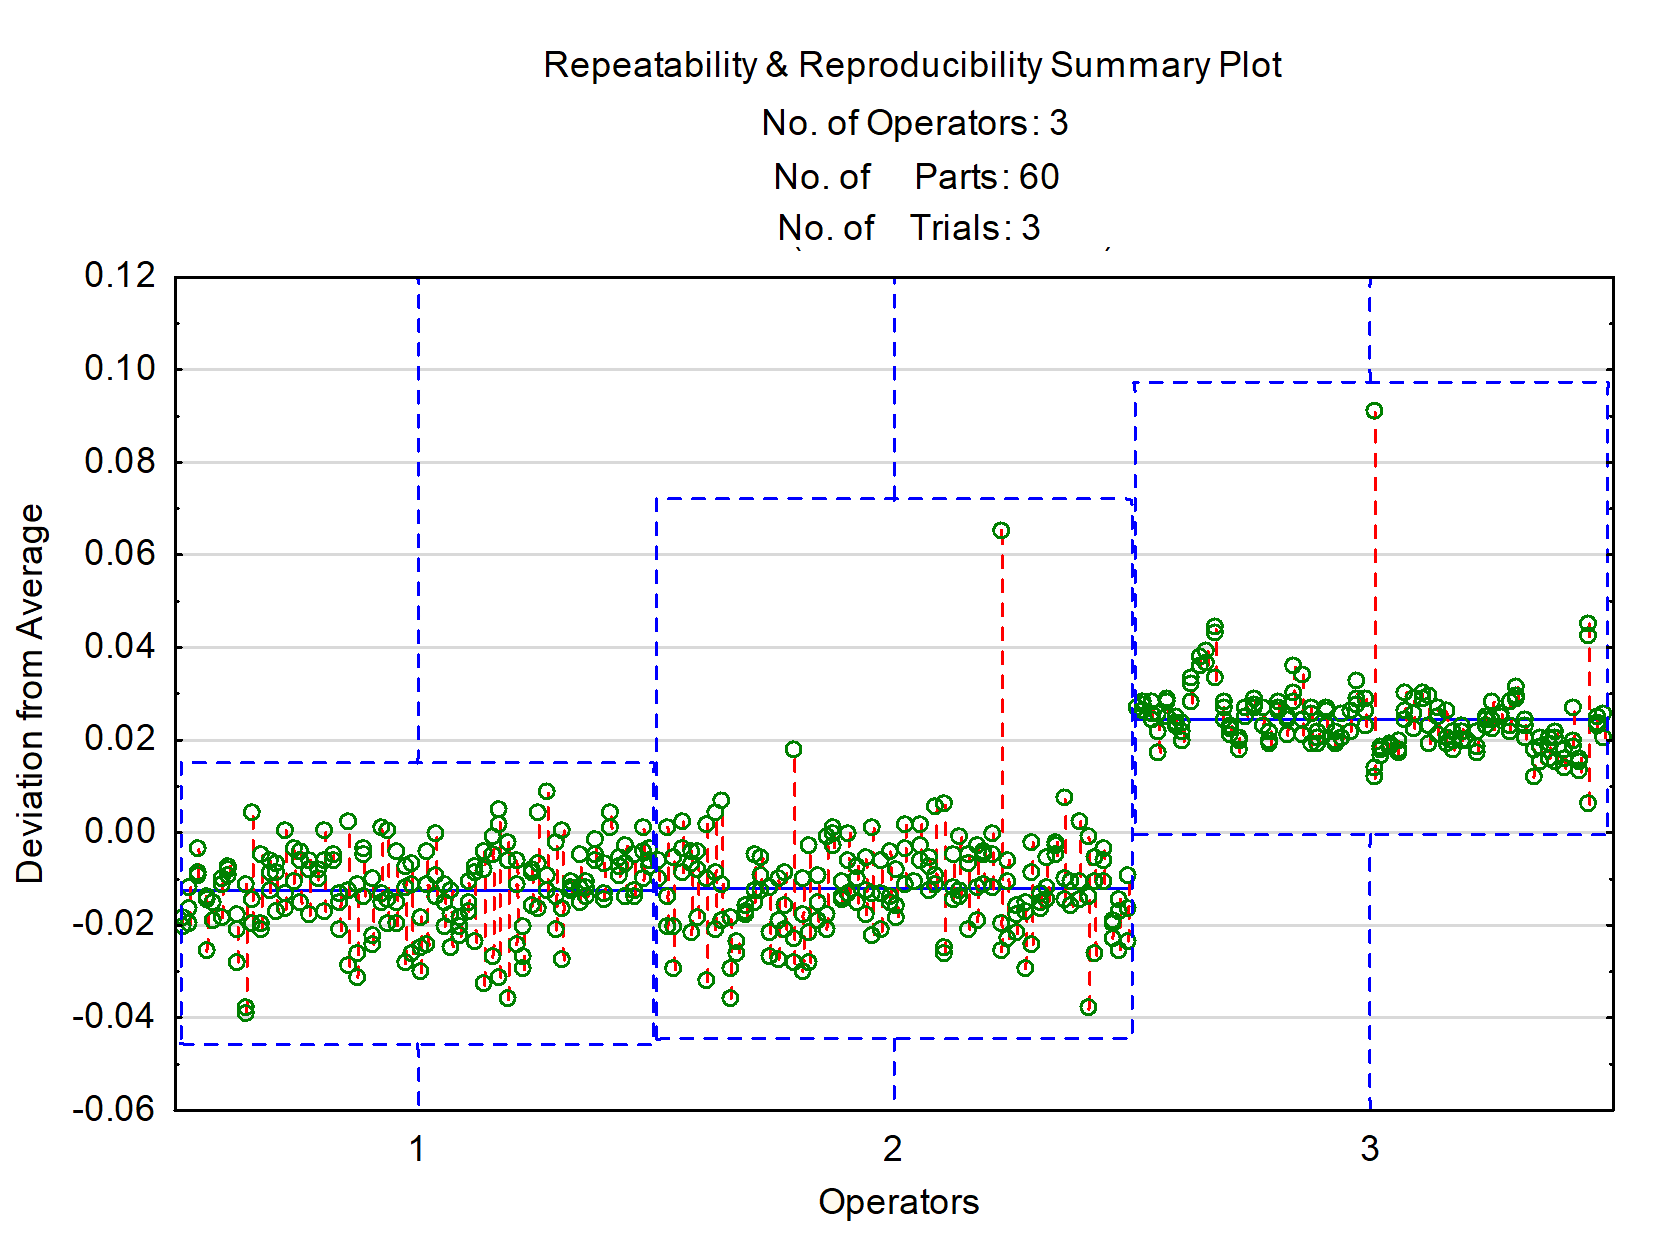


**Fig. S7** Graphical representation of the measured data at the 5th point of measurement of the tenon specimens with respect to each of the three testers

Table S9 R & R test of the measured data at the 2nd point of measurement of the mortise specimens for all the three testers (specimen-to-specimen variation)

| Source  (Sigma=R-bar/d2) | Variance Components:  Mean=8.16187, R-bar=0.214E-1 R(xbar)=0.175E-1, R(specimens)=0.105444  Operators: 3, Specimens: 60, Trials: 3 | | | |
| --- | --- | --- | --- | --- |
| Estimated  Sigma | Estimated  Variance | % of  R & R | % of  Total |
| Repeatability | 0.012653 | 0.000160 | 65.9231 | 21.3464 |
| Reproducibility | 0.009097 | 0.000083 | 34.0769 | 11.0344 |
| Specimen-to-specimen | 0.022521 | 0.000507 |  | 67.6192 |
| Combined R & R | 0.015584 | 0.000243 | 100.0000 | 32.3808 |
| Total | 0.027387 | 0.000750 |  | 100.0000 |

Table S10 R & R test of the measured data at the 3rd point of measurement of the mortise specimens for all the three testers (specimen-to-specimen variation)

| Source  (Sigma=R-bar/d2) | Variance Components:  Mean=8.23064, R-bar=0.253E-1 R(xbar)=0.156E-1, R(specimens)=0.190667  Operators: 3, Specimens: 60, Trials: 3 | | | |
| --- | --- | --- | --- | --- |
| Estimated  Sigma | Estimated  Variance | % of  R & R | % of  Total |
| Repeatability | 0.014928 | 0.000223 | 77.4356 | 11.4511 |
| Reproducibility | 0.008058 | 0.000065 | 22.5644 | 3.3368 |
| Specimen-to-specimen | 0.040722 | 0.001658 |  | 85.2121 |
| Combined R & R | 0.016964 | 0.000288 | 100.0000 | 14.7879 |
| Total | 0.044114 | 0.001946 |  | 100.0000 |

Table S11 R & R test of the measured data at the 4th point of measurement of the mortise specimens for all the three testers (specimen-to-specimen variation)

| Source  (Sigma=R-bar/d2) | Variance Components:  Mean=8.22355, R-bar=0.188E-1 R(xbar)=0.219E-1, R(specimens)=0.177667  Operators: 3, Specimens: 60, Trials: 3 | | | |
| --- | --- | --- | --- | --- |
| Estimated  Sigma | Estimated  Variance | % of  R & R | % of  Total |
| Repeatability | 0.011088 | 0.000123 | 48.5450 | 7.2610 |
| Reproducibility | 0.011415 | 0.000130 | 51.4550 | 7.6963 |
| Specimen-to-specimen | 0.037946 | 0.001440 |  | 85.0427 |
| Combined R & R | 0.015914 | 0.000253 | 100.0000 | 14.9573 |
| Total | 0.041147 | 0.001693 |  | 100.0000 |

Table S12 R & R test of the measured data at the 2nd point of measurement of the mortise specimens for all the three testers (given acceptable tolerance)

| Source  (Pooled Standard Deviation) | Percent Tolerance Analysis:  Mean=8.16187, Standard Deviation=0.324E-1  Operators: 3, Specimens: 60, Trials: 3 | | | |
| --- | --- | --- | --- | --- |
| Measurement  Units | % Process  Variation | % Total  Contribution | %  Tolerence |
| Repeatability (Equipment Variation) | 0.064986 | 48.6779 | 23.6954 | 32.4930 |
| Reproducibility (Appraiser Variation) | 0.044832 | 33.5814 | 11.2771 | 22.4159 |
| Specimen Variation | 0.107656 | 80.6396 | 65.0275 | 53.8278 |
| Combined R & R | 0.078950 | 59.1376 | 34.9725 | 39.4749 |
| Total Process Variation | 0.133502 | 100.0000 | 100.0000 | 66.7511 |
| Tolerance | 0.200000 |  |  | 100.0000 |

Table S13 R & R test of the measured data at the 3rd point of measurement of the mortise specimens for all the three testers (given acceptable tolerance)

| Source  (Pooled Standard Deviation) | Percent Tolerance Analysis:  Mean=8.23064, Standard Deviation=0.479E-1  Operators: 3, Specimens: 60, Trials: 3 | | | |
| --- | --- | --- | --- | --- |
| Measurement  Units | % Process  Variation | % Total  Contribution | %  Tolerance |
| Repeatability (Equipment Variation) | 0.078857 | 46.9435 | 22.0369 | 39.4284 |
| Reproducibility (Appraiser Variation) | 0.041943 | 24.9688 | 6.2344 | 20.9716 |
| Specimen Variation | 0.142269 | 84.6928 | 71.7286 | 71.1344 |
| Combined R & R | 0.089318 | 53.1708 | 28.2714 | 44.6588 |
| Total Process Variation | 0.167982 | 100.0000 | 100.0000 | 83.9911 |
| Tolerance | 0.200000 |  |  | 100.0000 |

Table S14 R & R test of the measured data at the 4th point of measurement of the mortise specimens for all the three testers (given acceptable tolerance)

| Source  (Pooled Standard Deviation) | Percent Tolerance Analysis:  Mean=8.22355, Standard Deviation=0.526E-1  Operators: 3, Specimens: 60, Trials: 3 | | | |
| --- | --- | --- | --- | --- |
| Measurement  Units | % Process  Variation | % Total  Contribution | %  Tolerence |
| Repeatability (Equipment Variation) | 0.057095 | 26.7926 | 7.1784 | 28.5477 |
| Reproducibility (Appraiser Variation) | 0.062466 | 29.3129 | 8.5925 | 31.2331 |
| Specimen Variation | 0.195577 | 91.7764 | 84.2291 | 97.7885 |
| Combined R & R | 0.084628 | 39.7126 | 15.7709 | 42.3141 |
| Total Process Variation | 0.213102 | 100.0000 | 100.0000 | 106.5508 |
| Tolerance | 0.200000 |  |  | 100.0000 |


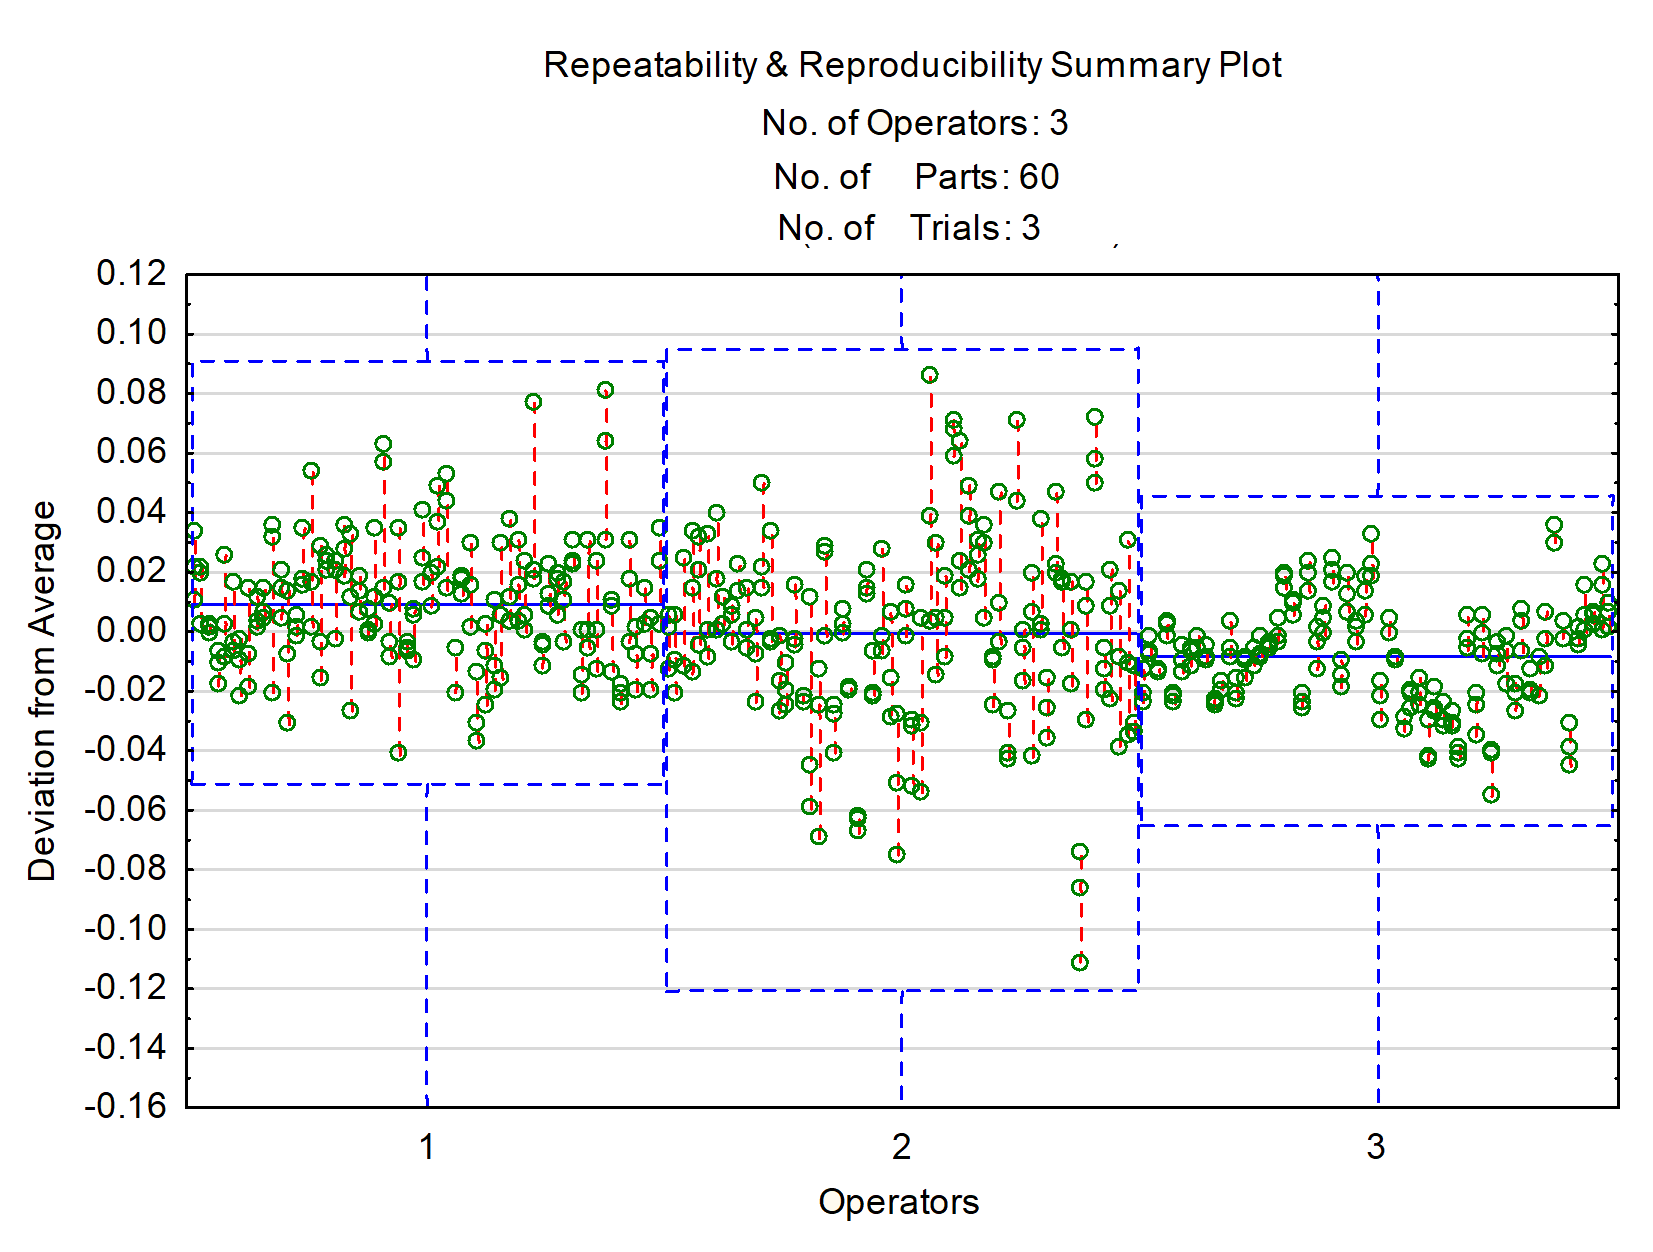


**Fig. S8** Graphical representation of the measured data at the 2nd point of measurement of the mortise specimens with respect to each of the three testers


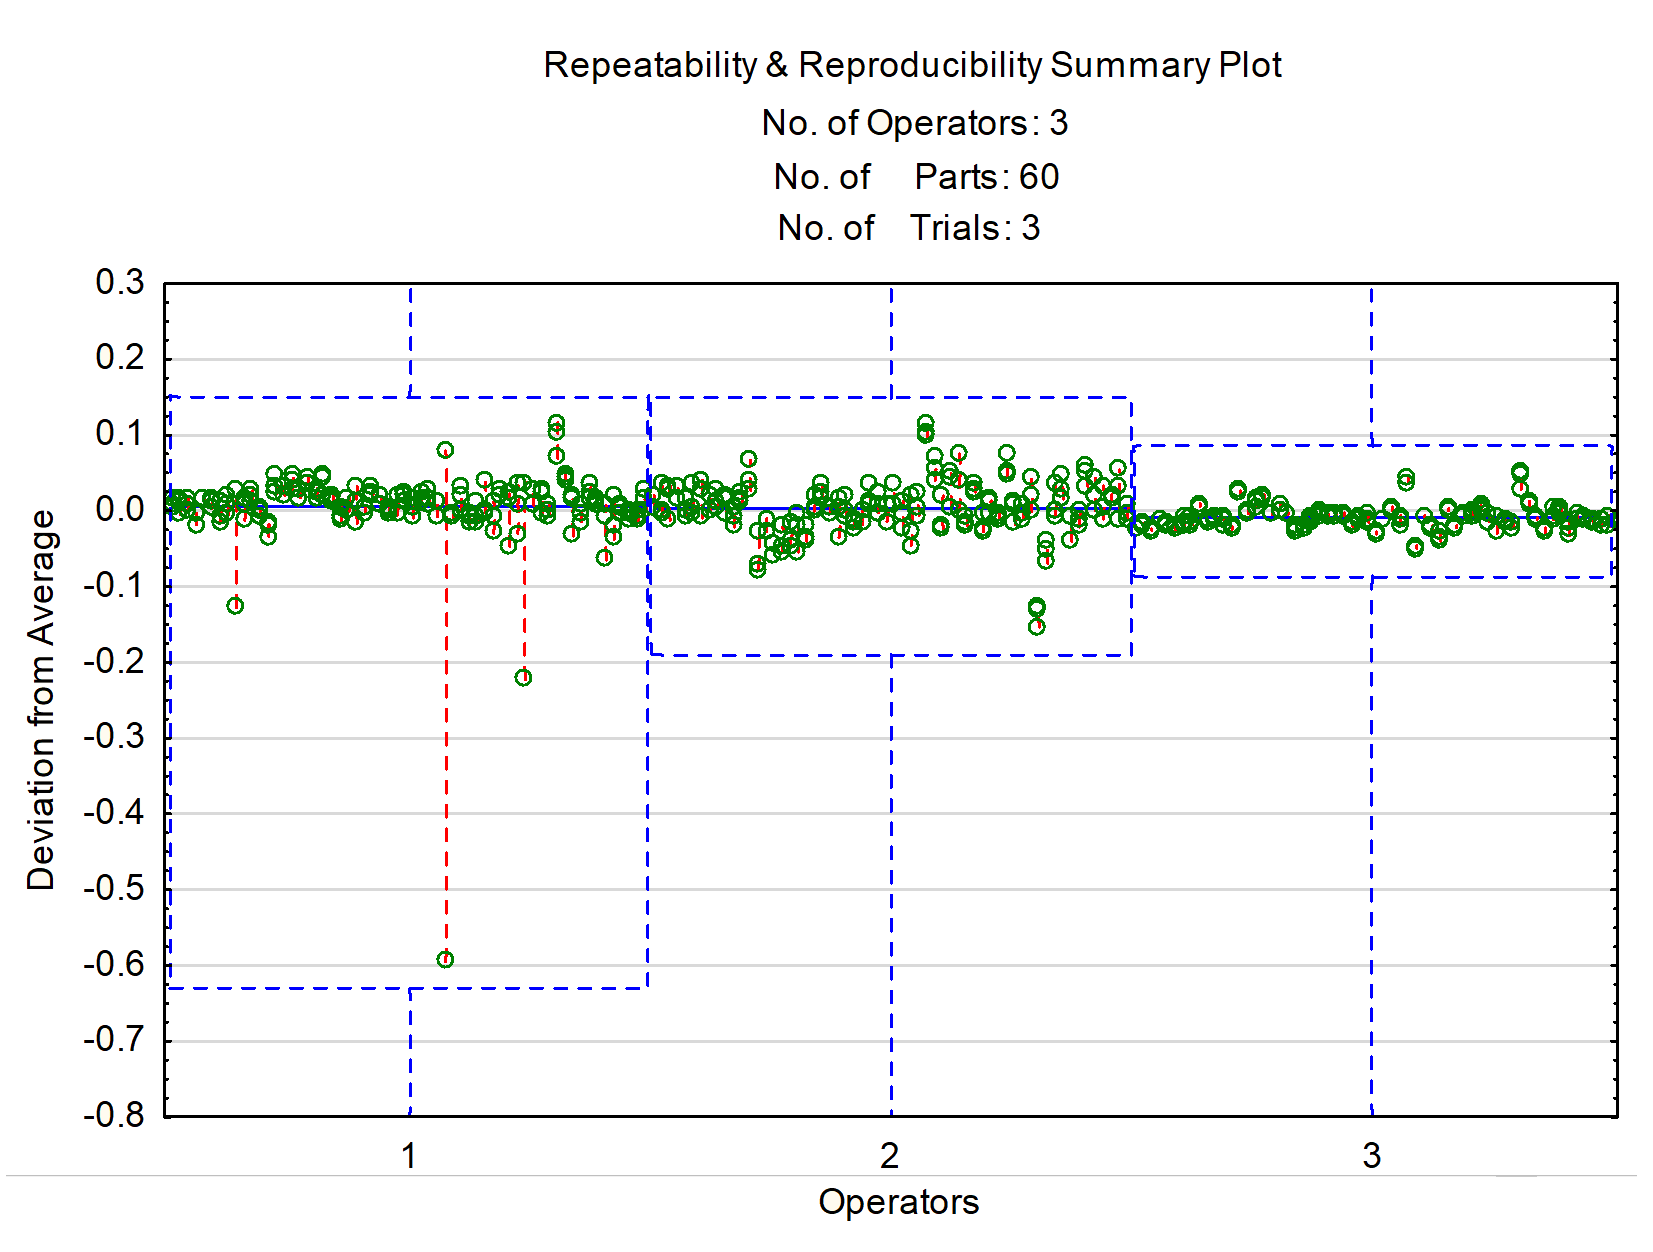


**Fig. S9** Graphical representation of the measured data at the 3rd point of measurement of the mortise specimens with respect to each of the three testers


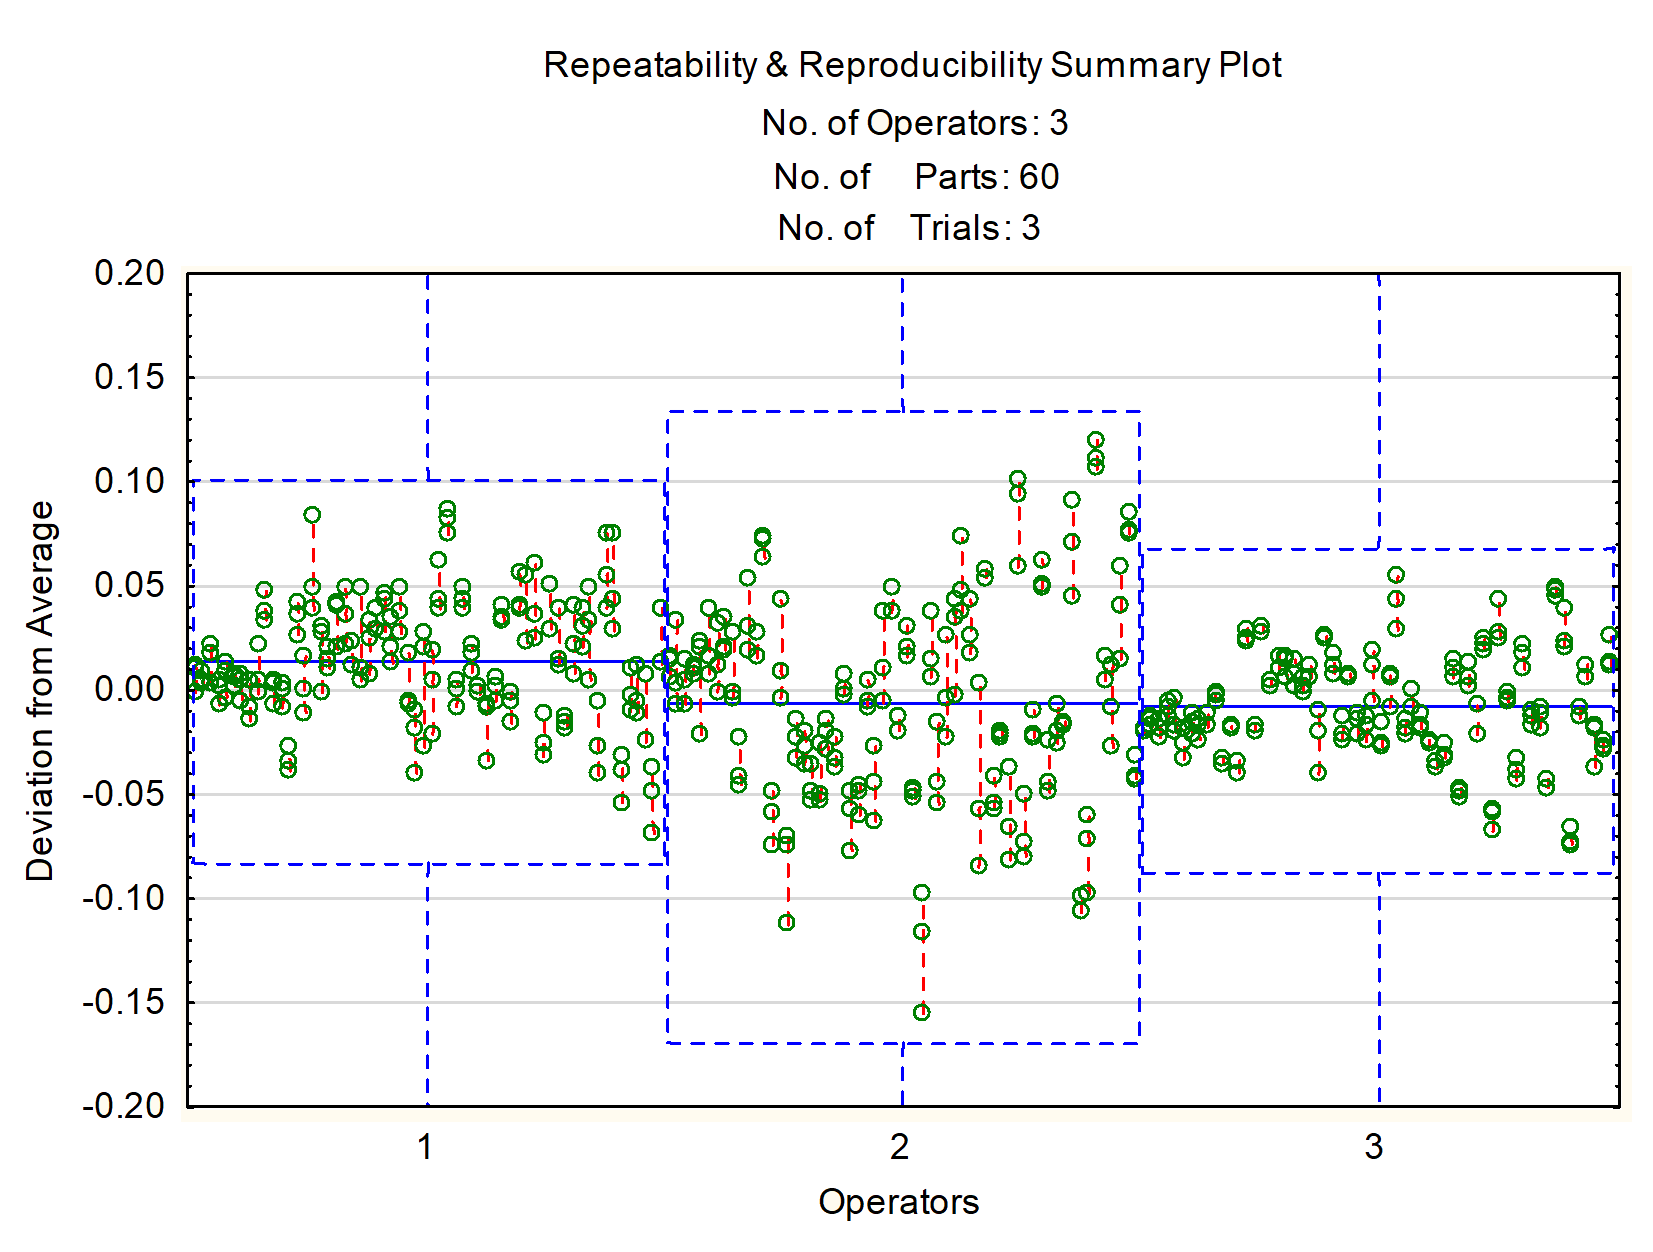


**Fig. S10** Graphical representation of the measured data at the 4th point of measurement of the mortise specimens with respect to each of the three testers


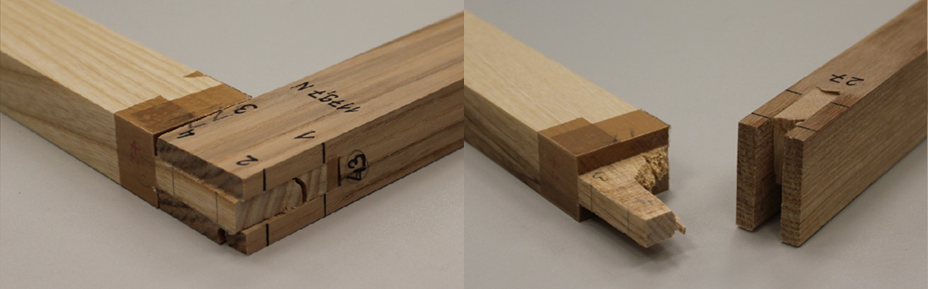


**Fig. S11** Double-glued joint after failure


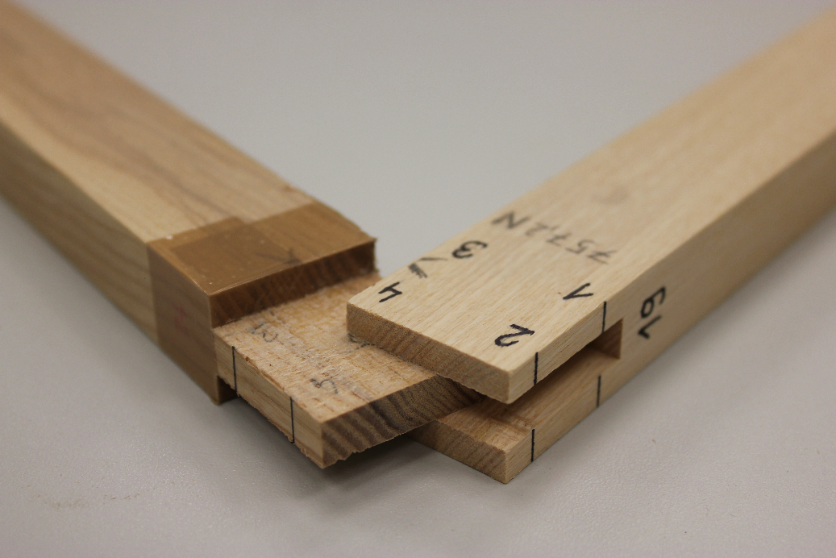


**Fig. S12** Single-glued joint after failure


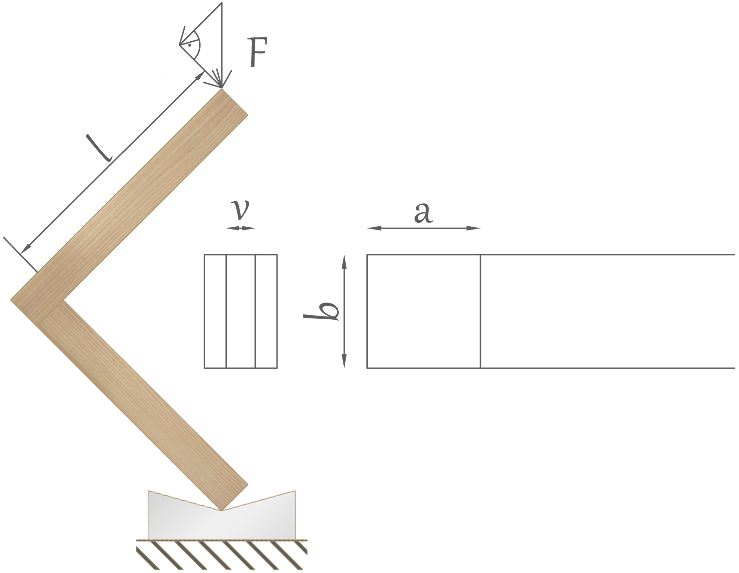


**Fig. S13** Schematic diagram for determination of the bending strength
